# Supplementary material
Source: Copernicus journal article supplement (doi:10.5194/egqsj-10-123-1959)
Supplement: Supplementary file 2 [file egqsj-10-123-1959-supplement.zip]

Table III. Distribution of macroscopic plant remains through the Histon Road deposits. The distribution and ecological groups are explained in the text.
